# Supplementary material
Source: PubMed Central journal article supplement (PMC9874461)
Supplement: JGS-71-157-s001.pdf [file JGS-71-157-s001.pdf]

**Supplementary tables for resident racial and ethnic composition, neighborhood-level socioeconomic status and COVID-19 infections in California SNFs**

Supplementary Table S1. Association of racial and ethnic composition with COVID-19 incidence rate with multiple scenarios

| Model      | Majority White Residents (IRR [95% CI]) | Mixed (IRR [95% CI]) | High Proportion Black or Hispanic/Latinx Residents (IRR [95% CI]) |
|------------|-----------------------------------------|----------------------|-------------------------------------------------------------------|
| Scenario 1 | Ref                                     | 2.02 (1.43, 2.85)*   | 2.73 (1.82, 4.09)*                                                |
| Scenario 2 | Ref                                     | 1.85 (1.34, 2.56)*   | 1.96 (1.31, 2.93)*                                                |

Abbreviation: Incidence Rate Ratio (IRR), Confidence intervals (CI).

\*Indicates p-value <0.05.

Scenario 1 = Changing thresholds for SNFs categorized for Black or Hispanic/Latinx residents from 32% to 25%.

Scenario 2 = Changing thresholds for SNFs with majority White residents from 88% to 80%.

Models adjust for number of certified beds, facility average age, proportion of residents on Medi-Cal, activities daily living score, overall facility rating, healthy places index score, proportion of neighborhood Black or Hispanic/Latinx, operating margin, and county COVID-19 incidence.

Supplementary Table S2. Facility ownership by skilled nursing facility resident racial and ethnic composition

| Variable         | Mixed (Mean [SD]) | ≥32% Black or Hispanic/Latinx (Mean [SD]) | ≥88% White (Mean [SD]) |
|------------------|-------------------|-------------------------------------------|------------------------|
| Government %     | 0.0               | 0.5                                       | 0.0                    |
| Not-for-profit % | 10.2              | 3.3                                       | 31.1                   |
| Profit %         | 89.8              | 96.3                                      | 68.9                   |

Supplementary Table S3. Association of racial and ethnic specific composition with COVID-19 incidence rate

| Model   | Majority White Residents (IRR [95% CI]) | High Proportion Black Residents (IRR [95% CI]) | High Proportion Hispanic/Latinx Residents (IRR [95% CI]) |
|---------|-----------------------------------------|------------------------------------------------|----------------------------------------------------------|
| Model 1 | Ref                                     | 1.27 (0.76, 2.12)                              | 3.25 (1.84, 4.77)*                                       |
| Model 2 | Ref                                     | 1.24 (0.69, 2.24)                              | 2.84 (1.79, 4.51)*                                       |
| Model 3 | Ref                                     | 0.86 (0.52, 1.41)                              | 1.54 (0.99, 2.39)                                        |

Abbreviation: Incidence Rate Ratio (IRR), Confidence intervals (CI).

\*Indicates p-value <0.05.

Model 1 = Adjusts for number of certified beds, facility average age, proportion of residents on Medi-Cal, activities daily living score, overall facility rating, operating margin, and employee turnover.

Model 2 = Model 1 + Healthy places index score, and proportion of neighborhood Black or Hispanic/Latinx.

Model 3 = Model 2 + County COVID-19 incidence.
